# Supplementary material for: Theoretical Evaluation of Polyelectrolyte Layering during Layer-by-Layer Coating of Ultrafiltration Hollow Fiber Membranes
Source: MDPI journal article supplement (doi:10.3390/membranes11020106), 2021-02-02
Supplement: s1 [file s1]

# Supplementary Material: Theoretical Evaluation of Polyelectrolyte Layering during Layer-by-Layer-Coating of Ultrafiltration Hollow Fibre Membranes

Jakob Stumme, Omjothi Ashokkumar, Saskia Dillmann, Robert Niestroj-Pahl and Mathias Ernst

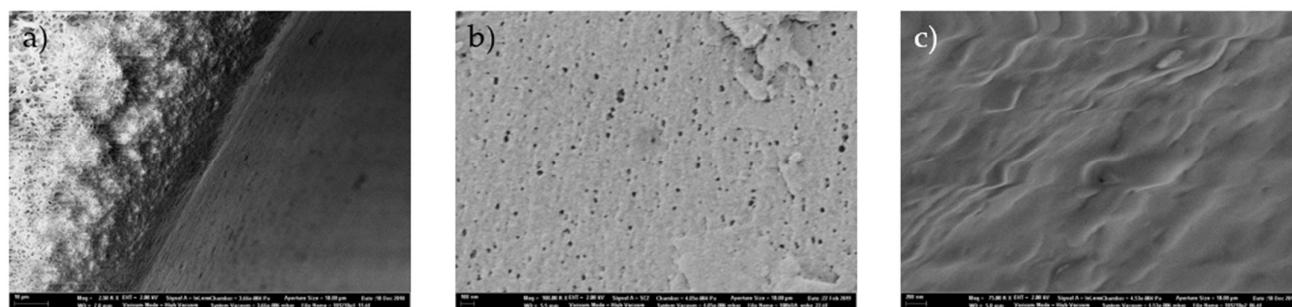

**Figure S1.** Scanning electron microscopy (SEM) pictures of the 100 kDa hollow fibre membrane. a) Crosssection and b) surface of a dried uncoated membrane, and c) Surface of a dried, 8 double layer coated membrane (taken from [1]).

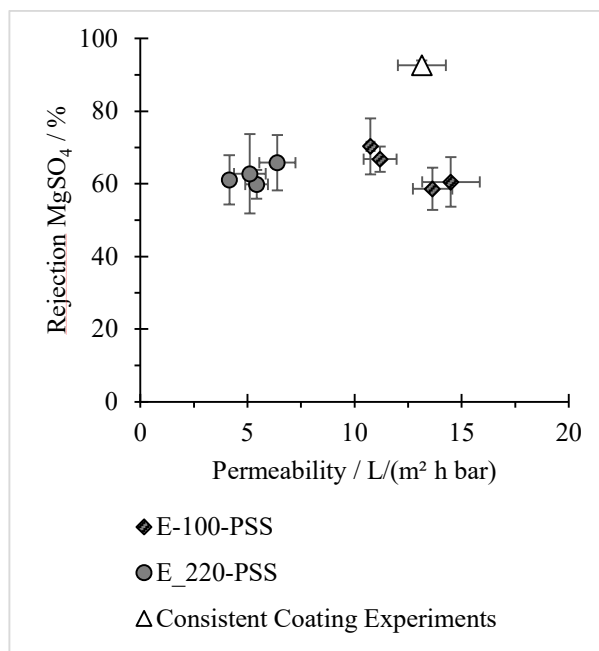

**Figure S2.** Rejection rate vs. permeability for experimental data in this study (E-100-PSS, E-220-PSS) and other conducted experiments (Consistent Coating Experiments,  $n = 5$ ). Membranes of “Consistent Coating Experiments” were modified in one consistent coating process without rejection experiments between each coating step. General coating and filtration parameters were comparable.

## References

1. Dillmann, S.; Kaushik, S.A.; Stumme, J.; Ernst, M. Characterization and Performance of LbL-Coated Multibore Membranes: Zeta Potential, MWCO, Permeability and Sulfate Rejection. *Membranes* **2020**, *10*, 412, doi:10.3390/membranes10120412.
